# Supplementary material for: Relationship between Spiritual Well-Being, Death Anxiety and Life Satisfaction in Coronary Artery Patients and Their Primary Caregivers: A Comparative Study
Source: Research Square preprint supplement (doi:10.21203/rs.3.rs-8126639/v1), 2025-12-04
Supplement: Supplementary file 1 [file b04dfc9660ee89f4a844981c.docx]

**(Appendix-1)**

Dear Participant,

This study is being conducted by graduate student **Ebru AYMAN KILIÇ**, **Prof. Dr. Abdullah ATLI**, and **Prof. Dr. Funda Gümüş** to assess the relationship between spiritual well-being, death anxiety, and life satisfaction among coronary artery patients hospitalized in the Cardiology Unit and their primary caregivers.
Thank you for participating in the study.

**Participant Information Form (Patient)**

1. Your age:
2. Gender: 1. Male 2. Female
3. Your place of residence: 1. City 2. District 3. Village
4. Your education level:
   1. Illiterate
   2. Literate
   3. Primary school
   4. Middle school
   5. High school
   6. University or above
5. Marital status: 1. Married 2. Single
6. Employment status: 1. Employed 2. Unemployed 3. Retired
7. What is your family type?
   1. Nuclear family
   2. Extended family
   3. Other (………….........)
8. Who do you live with at home?
   1. Alone
   2. Spouse and children
   3. Parents
   4. Other (…………)
9. Do you smoke? 1. Yes 2. No 3. I quit
10. Do you consume alcohol? 1. Yes 2. No 3. I quit
11. Do you have any chronic illnesses?
    1. Yes — Please specify (..........................................)
    2. No
12. How did you apply to the hospital? 1. Emergency 2. Planned
13. How many days have you been hospitalized in the clinic? (…………..) days
14. Do you know your diagnosis? 1. Yes 2. No
15. What is your medical diagnosis? ( ………………….…………………………… )
16. How long has it been since you were diagnosed with Coronary Artery Disease?
    1. Less than 6 months
    2. 6 months – 1 year
    3. 1–2 years
    4. 2 years or more
17. How do you evaluate your current health perception?
    1. Poor 2. Moderate 3. Good
18. Does being a cardiac patient make you feel hopeless about the future?
    1. Yes 2. No
19. Do you have any concerns related to your illness?
    (If your answer is yes, please answer question 20.)
    1. Yes 2. No
20. What are your concerns about the illness?
    1. Treatment
    2. Costs
    3. Caregivers
    4. Feeling inadequate
    5. Other (………………………………)

**Participant Information Form (Primary Caregiver)**

1. Your age:
2. Gender: 1. Male 2. Female
3. Place of residence: 1. Province 2. District 3. Village
4. Educational status: 1. Illiterate 2. Literate 3. Primary school 4. Middle school 5. High school 6. University or above
5. Marital status: 1. Married 2. Single
6. Employment status: 1. Employed 2. Unemployed 3. Retired
7. What is your family type? 1. Nuclear family 2. Extended family 3. Other (………….........)
8. Who are the people you live with at home? 1. Alone 2. Spouse and children 3. Parents 4. Other (…………)
9. Do you smoke? 1. Yes 2. No 3. I quit
10. Do you consume alcohol? 1. Yes 2. No 3. I quit
11. Do you have any chronic illnesses? 1. Yes (Please specify: ..........................................) 2. No
